# Supplementary material
Source: Springer Nature journal article supplement (https://www.springermedizin.de/resource/supplementary/12871_2014_323_MOESM4_ESM.pdf/9429114)

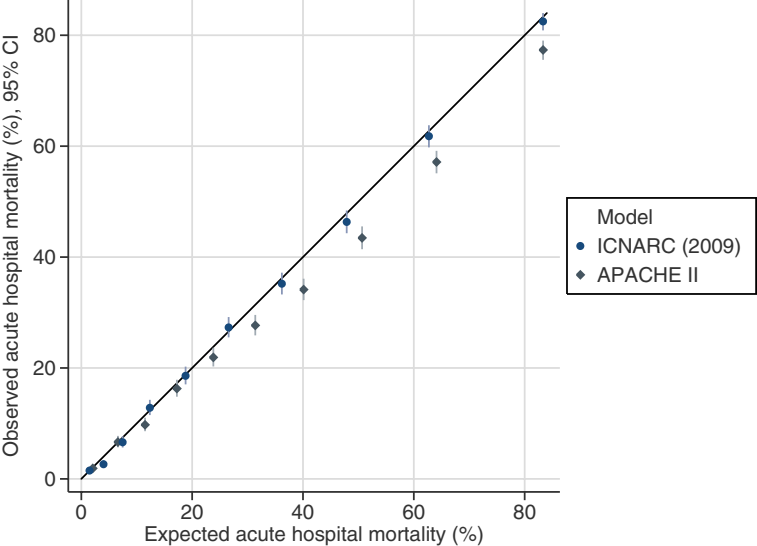

Supplement: MOESM4 [file 9429114]
